# Supplementary material
Source: Springer Nature journal article supplement (https://www.springermedizin.de/resource/supplementary/12888_2010_807_MOESM3_ESM.pdf/9478832)

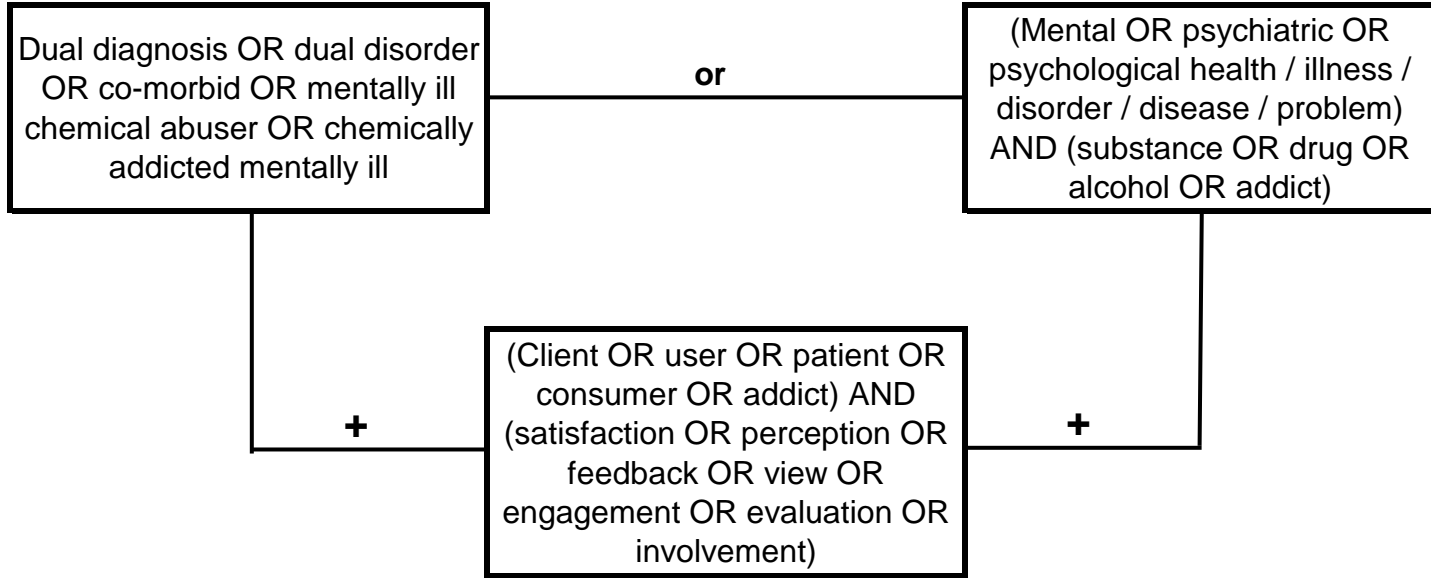

Supplement: MOESM3 [file 9478832]
